# Supplementary material for: Theoretical Formulation/Development of Signal Sampling with an Equal Arc Length Using the Frame Theorem
Source: Research Square preprint supplement (doi:10.21203/rs.3.rs-993947/v1), 2021-11-17
Supplement: Supplementary file 1 [file 05cbea79c465768ba3d3f025.docx]

**Declaration of interests**

The authors declare that they have no known competing financial interests or personal relationships that could have appeared to influence the work reported in this paper.

The authors declare the following financial interests/personal relationships which may be considered as potential competing interests:
